# Supplementary material for: Vitamin D and Calcium Supplementation in Nursing Homes—A Quality Improvement Study
Source: MDPI journal article supplement (doi:10.3390/nu14245360), 2022-12-16
Supplement: s1 [file s1]

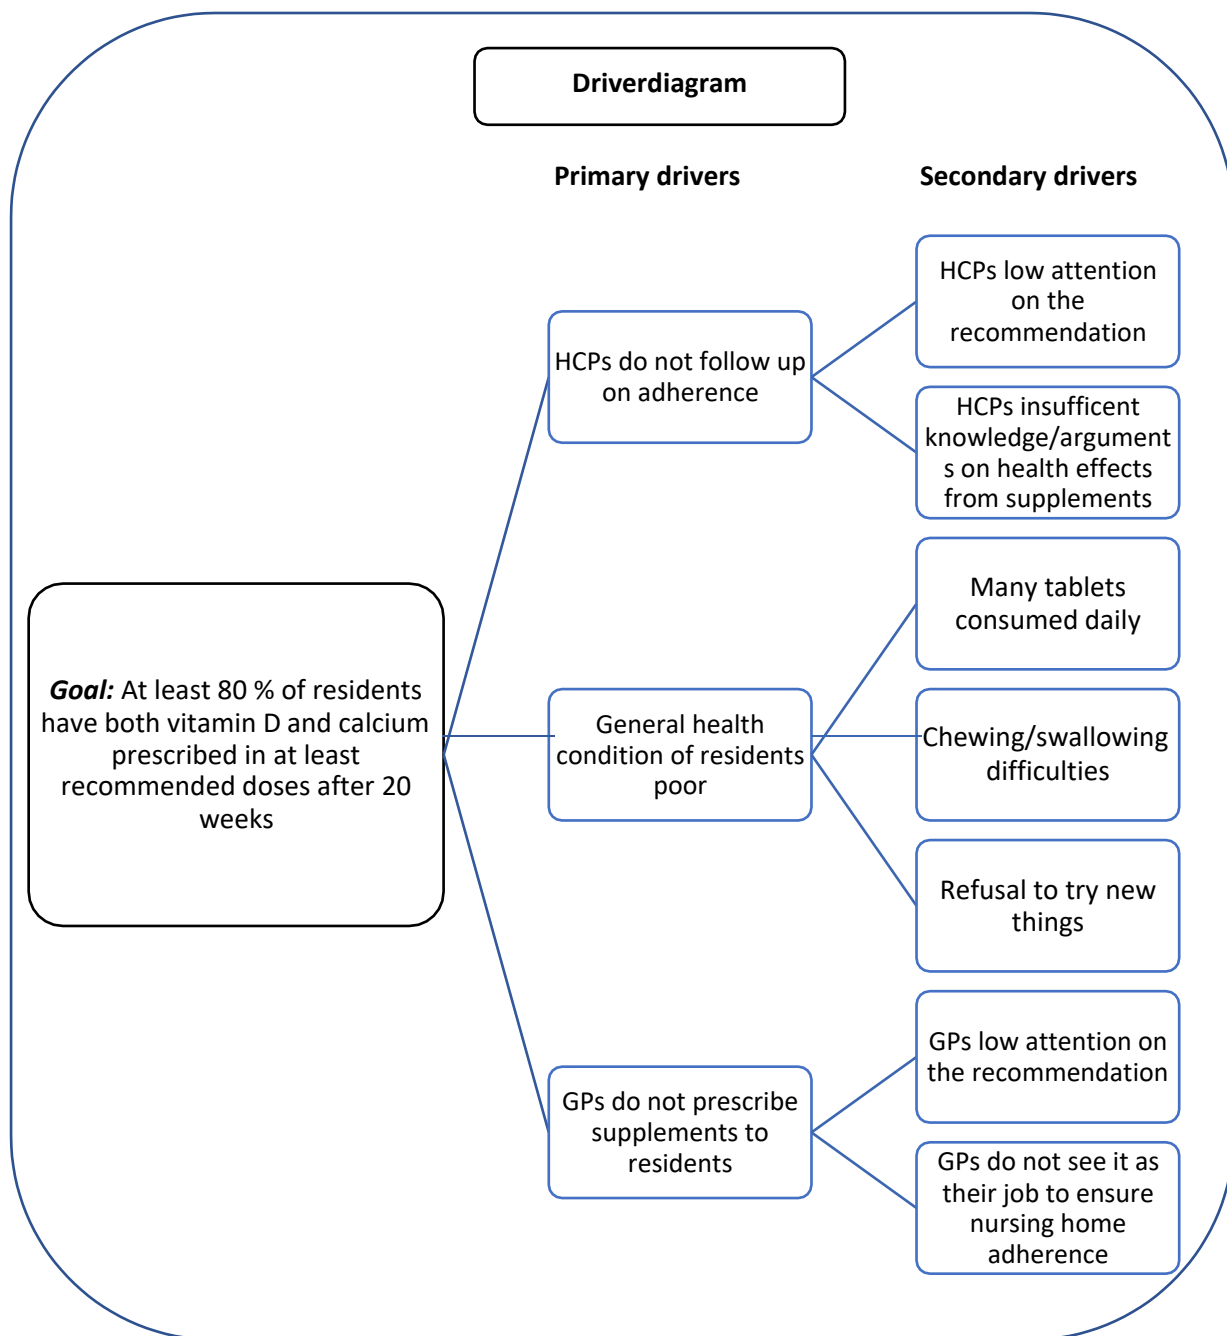

**Supplementary Figure S1.** Driver diagram including the goal of the project and primary and secondary drivers affecting the goal. *Abbreviations:* GPs, General practitioners, HCPs, Health care professionals.
